# Supplementary material for: Extension of ring closing metathesis methodology to the synthesis of carbocyclic methyl and silyl enol ethersElectronic supplementary information (ESI) available: full experimental details. See http://www.rsc.org/suppdata/cc/b2/b208445g/
Source: Royal Society of Chemistry journal article supplement (doi:10.1039/b208445g), 2002-10-09
Supplement: b208445g.doc [file b208445g.doc]

**Supporting Information for**

**Extension of ring closing metathesis methodology to**

**the synthesis of carbocyclic methyl and silyl enol ethers.**

Varinder K. Aggarwal*, Adrian M. Daly

School of Chemistry, University of Bristol, Cantock’s Close, Bristol, BS8 1TS, U.K.

Fax: +44-117-9298611; Tel: +44-117-9546315; E-mail: [v.aggarwal@bristol.ac.uk](mailto:v.aggarwal@bristol.ac.uk)

**General Experimental**

Flash chromatography was performed on silica gel (Merck Kiesegel 60F254 230-400 mesh). TLC was performed on aluminium backed silica plates (60F254) which were developed using standard visualizing agents: UV fluorescence (254 and 366 nm), phosphomolybdic acid /∆, anisaldehyde / ∆, permanganate /∆. Melting points were determined on a Khöfler hot stage. Infrared spectra were recorded on a Perkin-Elmer Spectrum One FT-IR spectrometer. Only selected absorbencies (max) are reported. 1H NMR spectra were recorded at 270 or 400 MHz on Jeol Delta GX/270 or Jeol Delta GX/400 instruments, respectively. Chemical shifts (H) are quoted in parts per million (ppm), referenced to TMS. 13C NMR spectra were recorded at 100 MHz on Delta GX/270 or Delta GX/400 instruments, respectively. Chemical shifts (C) are quoted in parts per million (ppm), referenced to the appropriate residual solvent peak. Degenerate peaks are prefixed by the number of carbons. Low resolution mass spectra (m/z) were recorded on a Micromass Analytical Autospec spectrometer with only molecular ions M+ and major peaks being reported with intensities quoted as percentages of the base peak. High-resolution mass spectra were recorded on a Micromass Analytical Autospec spectrometer. Liquid reagents were distilled before use, while solid reagents were generally used as supplied. Ruthenium catalysts **1** and **2** was purchased from Strem Chemicals. THF, toluene, CH2Cl2 and Et2O were pre-dried and then purified by passing through a solvent column prior to use.1 Anhydrous benzene was purchased from Aldrich Chemical Co. and used as supplied.

**1-methoxy-1-methylene-3-phenylhex-5-ene (3a)**

Dimethyl titanocene2 (3.98 g of a 12.8 wt. % solution in toluene) was added to a solution of methyl 3-phenylhex-5-enoate3 (250mg, 1.22 mmol) in THF (5 mL) and the mixture heated in the dark at an oil bath temperature of 65 ˚C for 15 hours under an atmosphere of N2 . At this point GCMS analysis of an aliquot removed from the reaction showed 60% conversion. The reaction was cooled to room temperature, the solvent was removed *in vacuo* and the residue triturated with hexane. The hexane was removed *in vacuo* and the orange residue purified by column chromatography on basic alumina (activity III, elution with 97:3 petrol: EtOAc) to yield 115 mg (47%) of a pale yellow oil; H (400 MHz; CDCl3) 2.28-2.47 (4H, m, C*H*2CHPhC*H*2), 2.93-3.01 (1H, m, C*H*Ph), 3.46 (3H, s, OC*H*3), 3.73 (1H, s, C(OCH3)C*H*2), 3.81 (1H, s, C(OCH3)C*H*2), 4.87-5.02 (1H, m, CH2C*H*CH2), 5.59-5.69 (2H, m, C*H*2CH=CH2), 7.10-7.30 (5H, m, ArH); C (100 MHz; CDCl3) 40.10, 41.9, 43.2, 54.8, 82.4, 116.1, 126.1, 127.7, 128.2, 136.9, 144.6, 162.0; MS (EI) *m/z* (relative intensity) 202 (M+, 5), 174 (20), 160 (16), 129 (100), 115 (21), 103 (17), 91 (73), 77 (11), 57 (13).

**Methyl 3-phenylhept-6-enoate**

4-bromobutene (3.76 mL, 37.0 mmol), was added dropwise to a suspension of magnesium (1.15 g, 47.2 mmol) in Et2O (20 mL) under an atmosphere of N2 at such a rate as to maintain a gentle reflux. After reflux had ceased the reaction was heated to reflux for 30 mins and then cooled to room temperature. Methyl *trans*-cinnamate (6.01 g, 37.0 mmol), copper (I) chloride (110 mg, 1.11 mmol) and chlorotrimethylsilane (5.64 mL, 44.4 mmol) were dissolved in THF (100 mL) under an atmosphere of N2 and cooled to 0 ˚C. To this was added dropwise the solution of Grignard reagent with vigorous stirring. The reaction was warmed to room temperature and stirred for 2 hours then quenched with satd. NH4Cl (50mL). The organic phase was separated and the aqueous phase extracted with Et2O (3 x 75 mL). The organic phases were combined, washed with HCl (2M, 100 mL), brine (100 mL), dried over MgSO4 and the solvent was removed *in vacuo* to yield a yellow oil which was purified by column chromatography (silica, hexane/CH2Cl2 100:0  50:50) to give 2.65 g (33%) of a colourless liquid; R*f* 0.55 (petrol:EtOAc 7:3); IR 2927, 1736, 1436, 1155, 910, 761, 700; H (270 MHz; CDCl3) 1.64-1.98 (4H, m, PhCHC*H*2C*H*2CH2), 2.58 (1H, dd, *J* = 15.2 and 7.9, COC*H*2), 2.64 (1H, dd, *J* = 15.2 and 7.3, COC*H*2), 3.07-3.18 (1H, m, C*H*Ph), 3.58 (3H, s, OC*H*3), 4.89-4.99 (2H, m, C*H*2=CH), 5.67-5.82 (1H, m, CH2=C*H*), 7.15-7.32 (5H, m, ArH); C (100 MHz; CDCl3) 31.5, 35.3, 41.6, 41.7, 51.5, 114.8, 126.6, 127.5, 128.5, 138.2, 143.7, 172.7; MS (EI) *m/z* (relative intensity) 218 (M+, 2), 176 (51), 144 (44), 121 (100), 104 (63), 91 (92).

**1-methoxy-1-methylene-3-phenylhept-6-ene (3b)**

Using the same procedure as for **3a** methyl 3-phenylhept-6-enoate (250 mg, 1.15 mmol) yielded a pale yellow oil (109 mg, 44%); H (400 MHz; CDCl3) 1.58-1.68 (1H, m, CHPhC*H*2CH2), 1.73-1.82 (1H, m, CHPhC*H*2CH2), 1.84-1.92 (2H, m, CHPhCH2C*H*2), 2.30-2.42 (2H, m, CHPhC*H*2C(OCH3)), 2.84-2.93 (1H, m, C*H*Ph), 3.47 (3H, s, OCH3), 3.72 (1H, d, *J* = 2.0, C(OCH3)C*H*2), 3.79 (1H, d, *J* = 2.0, C(OCH3)C*H*2), 4.88-4.96 (2H, m , C*H*2CHCH2), 5.70-5.80 (1H, m, CH2C*H*CH2), 7.12-7.20 (3H, m, ArH), 7.24-7.29 (2H, m, ArH); C (100 MHz; CDCl3) 31.7, 34.8, 42.8, 42.9, 54.7, 82.2, 114.4, 126.0, 127.7, 128.2, 138.8, 145.0, 162.2; MS (EI) *m/z* (relative intensity) 216 (M+, 5), 201 (2), 188 (7), 173 (14), 161 (20), 129 (34), 91 (100), 77 (8).

**1-methoxy-4-phenylcyclopent-1-ene (4a)**

**2** (14 mg, 17.0 mol) and **3a** (34.4 mg, 170 mol) were dissolved in anhydrous benzene (30 mL) under an atmosphere of N2 and heated at reflux (oil bath temp. of 105 ˚C) for 1 hour. On cooling to room temperature the solvent was removed *in vacuo*. The yield of **4a** was measured to be 53% using *p*-dimethoxybenzene as an NMR internal standard. To obtain a sample for characterisation the residue was purified by column chromatography on basic alumina (activity III, petrol/EtOAc 97:3); H (400 MHz; CDCl3) 2.38-2.46 (1H, m, CHPhC*H*2COMe), 2.50-2.59 (1H, m, CHPhC*H*2COMe), 2.72-2.82 (2H, m, CHPhC*H*2CH), 3.40-3.52 (1H, m, CHPh), 3.64 (3H, s, OCH3), 4.48-4.51 (1H, m, C*H*COMe), 7.14-7.32 (5H, m, ArH); C (100 MHz; CDCl3) 38.0, 40.1, 41.6, 56.7, 92.6, 126.0, 126.9, 128.5, 147.0, 159.4; MS (EI) *m/z* (relative intensity) 174 (M+, 100), 159 (21), 141 (52), 128 (40), 115 (43), 103 (13), 91 (22), 77 (8), 55 (65);

**3-phenylcyclopentan-1-one**

**4a** (50 mg, 287 mol) was dissolved in MeOH (10 mL) and 3 drops of conc. HCl were added. The mixture was stirred at 40 ˚C for 2 hours. On cooling to room temperature water (10 mL) and Et2O (10 mL) were added and the organic phase separated, dried over Na2SO4 and the solvent was removed *in vacuo* to give a brown oil. This was purifed by column chromatography (silica, petrol/EtOAc 9:1) to give a colourless liquid (29 mg, 63%). 1H and 13C NMR of this agrees with a previous literature report:4 H (400 MHz; CDCl3) 1.96-2.02 (1H, m, CHPhC*H*2), 2.31-2.50 (4H, m, C*H*2), 2.67 (1H, dd, *J* = 18.3 and 7.3, COC*H*2), 3.35-3.47 (1H, m, C*H*Ph), 7.22-7.37 (5H, m, ArH); C (100 MHz; CDCl3) 31.3, 38.9, 42.3, 45.6, 126.8, 127.0, 128.5, 143.1, 218.1.

This experiment confirms the identity of **4a** and in subsequent ring closing metathesis experiments the signals in the 1H NMR spectrum in the region of 4.5-5.0 ppm (enol ether proton) and at 2.5-3.5 ppm (benzylic proton) were used as diagnostic signals for measurement of the reaction yield. The identity of the cyclic products were also confirmed by GCMS analysis of the crude reaction products.

**1-methoxy-5-phenylcyclohex-1-ene (4b)**

Using the same conditions as for **4a** cyclisation of **3b** (40 mg, 185 mol) in benzene (35 mL) gave a 50% yield of **4b**. Diagnostic signals: H (400 MHz; CDCl3) 4.65-4.70 (1H, m, C*H*=COCH3), 2.83-2.92 (1H, m, PhC*H*); MS (EI) *m/z* (relative intensity) 188 (M+, 100), 173 (6), 156 (10), 129 (14), 115 (25), 104 (95), 91 (31), 84 (99), 77 (21).

**1,1-dimethyl-1-(1-methylene-3-phenylhex-5-enyloxy)-1-silaethane (5a)**

Diisopropylamine (1.23 mL, 8.77 mmol) was dissolved in THF (30 mL) under an atmosphere of N2 and cooled to 0 ˚C. nBuLi (5.62 mL of a 1.56M solution in hexanes, 8.77 mmol) was added dropwise and the resulting solution stirred for 10 minutes and then cooled to –78 ˚C. 4-Phenylhept-6-en-2-one5,6 (1.50 g, 7.97 mmol) was added dropwise over 5 minutes and after stirring for a further 20 minutes the reaction was quenched with chlorotrimethylsilane (1.11 mL, 8.77 mmol) and warmed to room temperature. Satd. NaHCO3 (20 mL) was added and the mixture extracted with pentane (2 x 50 mL). The extracts were dried over MgSO4 and the solvent was removed *in vacuo* to give a yellow oil which was purified by Kugelrohr distillation (bp 75 ˚C @ 0.01 mm Hg) to give a colourless liquid (1.89 g, 91%); max(neat)/cm-1 2959, 1739, 1639, 1251, 1010, 840, 698; H (400 MHz; CDCl3) 0.15 (9H, m, Si(CH3)3), 2.25-2.47 (4H, m, C*H*2CHPhC*H*2), 2.90-2.98 (1H, m, C*H*Ph), 3.94 (1H, d, *J* = 0.9, C(OSiMe3)=C*H*2), 3.96 (1H, d, *J* = 0.9, C(OSiMe3)=C*H*2), 4.89-4.98 (2H, m, C*H*2=CH), 5.58-5.69 (1H, m, CH2=C*H*), 7.14-7.29 (5H, m, ArH); C (100 MHz; CDCl3) 0.5, 40.4, 42.9, 43.1, 91.4, 116.1, 126.1, 127.9, 128.2, 136.9, 144.8, 157.4; MS (EI) *m/z* (relative intensity) 260 (M+, 21), 232 (19), 218 (23), 203 (15), 169 (10), 141 (16), 130 (90), 115 (52), 91 (57), 73 (100); HRMS(CI) *M+* found 260.1586, C16H24OSi requires 260.1596

**1,1-diethyl-1-(1-methylene-3-phenylhex-5-enyloxy)-1-silapropane (5b)**

Using the same procedure as for **5a** with chlorotriethylsilane substituted for chlorotrimethylsilane gave a colourless oil (1.81g, 75%) after Kugelrohr distillation (bp 145 ˚C @ 0.01 mm Hg); max(neat)/cm-1 2955, 2877, 1738, 1235, 1005, 730; H (400 MHz; CDCl3) 0.66 (6H, q, *J* = 8.0, SiC*H*2), 0.96 (9H, t, *J* = 8.0, SiCH2C*H*3), 2.26 (4H, m, CH2=CHC*H*2), 2.94-3.01 (1H, m, CHPh), 3.91 (1H, s, C(OSiEt3)=C*H*2), 3.98 (1H, s, C(OSiEt3)=C*H*2), 4.88-4.97 (2H, m, C*H*2=CH), 5.58-5.69 (1H, m, CH2=C*H*), 7.14-7.29 (5H, m, ArH); C (100 MHz; CDCl3) 5.0, 6.7, 40.2, 42.9, 43.4, 90.8, 116.0, 126.1, 127.8, 128.2, 137.0, 144.9, 157.5; MS (EI) *m/z* (relative intensity) 302 (M+, 11), 287 (13), 273 (16), 261 (65), 245 (16), 169 (52), 143 (56), 130 (91), 115 (86), 103 (100), 87 (75), 75 (21), 59 (32); HRMS *MH+* found 303.2142, C19H31OSi requires 303.2144.

**1,1,2,2-tetramethyl-1-(1-methylene-3-phenylhex-5-enyloxy)-1-silapropane (5c)**

Using the procedure of Corey and Sodeoka7 4-Phenylhept-6-en-2-one5,6 (200 mg) was reacted to give, after Kugelrohr distillation (bp 100 ˚C @ 0.01 mmHg), a colourless liquid (170 mg, 53%); max(neat)/cm-1 2929, 2858, 1253; H (400 MHz; CDCl3) 0.10 (3H, s, SiC*H*3), 0.14 (3H, s, SiC*H*3), 0.93 (9H, s, SiCC*H*3), 2.25-2.48 (4H, m, C*H*2CHPhC*H*2), 2.93-3.01 (1H, m, C*H*Ph), 3.92 (1H, s, C*H*2=COTBDMS), 3.97 (1H, s, C*H*2=COTBDMS), 4.88-4.97 (2H, m, C*H*2=CH), 5.58-5.69 (1H, m, CH2=C*H*), 7.14-7.28 (5H, m, ArH); C (100 MHz; CDCl3) –4.7, -4.6, 18.2, 25.8, 40.0, 42.8, 43.5, 91.4, 116.0, 126.1, 127.5, 128.2, 136.9, 144.8, 157.4; MS (CI) *m/z* (relative intensity) 303 (MH+, 3), 131 (58), 85 (100), 57 (66); HRMS *MH+* found 303.2144, C19H31OSi requires 303.2144

**1,1-bis(methylethyl)-2-methyl-1-(1-methylene-3-phenylhex-5-enyloxy)-1-silapropane (5d)**

Using the same procedure as for **5a** with triisopropylsilyltrifluoromethane sulfonate substituted for chlorotrimethylsilane gave a colourless oil (88%) after Kugelrohr distillation (bp 200 ˚C @ 0.01 mm Hg); max(neat)/cm-1 2944, 2867, 1739, 1464, 996, 882; H (400 MHz; CDCl3) 1.03-1.10 (18H, m, CH(C*H*3)2), 1.12-1.23 (3H, m, C*H*(CH3)), 2.28-2.42 (3H, m, C*H*2CHPhC*H*2), 2.43-2.52 (1H, m, C*H*2CHPh), 2.99-3.07 (1H, m, C*H*Ph), 3.90 (1H, s, C*H*2=COTIPS), 3.98 (1H, s, C*H*2=COTIPS), 4.88-4.96 (2H, m, C*H*2=CH), 5.58-5.69 (1H, m, CH2=C*H*), 7.14-7.28 (5H, m, ArH); C (100 MHz; CDCl3) 12.7, 18.1, 40.0, 42.9, 43.7, 90.6, 116.0, 126.0, 127.8, 128.2, 137.0, 145.0, 157.5; MS (CI) *m/z* (relative intensity) 345 (MH+, 8), 330 (18), 314 (26), 303 (23), 286 (42), 157 (92), 131 (52), 114 (100), 85 (52), 57 (49); HRMS(CI) *MH+* found 345.2605, C22H37OSi requires 345.2614.

**4-cyclohexylhept-6-en-2-one**

(3*E*)-4-cyclohexylbut-3-en-2-one8 (1.40g, 9.20 mmol) was reacted with allyltrimethylsilane (2.19 mL, 13.8 mmol) and titanium tetrachloride (1.23 mL, 11.2 mmol) according to the procedure of Heathcock and co-workers6 to give a colourless oil (1.25 g, 70%); max(neat)/cm-1 2922, 2851, 1716, 1448, 1355, 1217, 1161, 910; H (400 MHz; CDCl3) 0.93-1.48 (6H, m, CyH), 1.62-1.81 (5H, m, CyH), 1.92-2.02 (2H, m, CyC*H*2CH), 2.17 (3H, s, COC*H*3), 2.16-2.21 (1H, m, CHCy), 2.36 (1H, dd, *J* = 6.4 and 16.6, C*H*2COCH3), 2.36 (1H, dd, *J* = 6.4 and 15.6, C*H*2COCH3), 5.01-5.05 (2H, m, C*H*2=CH), 5.71-5.80 (1H, m, CH2=C*H*); C (100 MHz; CDCl3) 26.7, 29.7, 30.1, 30.3, 36.0, 38.6, 40.6, 45.3, 116.2, 137.5, 209.0; MS (EI) *m/z* (relative intensity) 194 (M+, 1), 176 (8), 151 (11), 136 (100), 121 (33), 107 (61), 95 (53), 81 (72), 67 (77), 55 (49); HRMS(CI) *MH+* found 195.1746, C13H23O requires 195.1749.

**1-(3-cyclohexyl-1-methylenehex-5-enyloxy)-1,1,2,2-tetramethyl-1-silapropane (5e)**

Using the procedure of Corey and Sodeoka7 4-cyclohexylhept-6-en-2-one (500 mg) was reacted to give, after Kugelrohr distillation (bp 100 ˚C @ 0.01 mmHg), a colourless liquid (259 mg, 65%); max(neat)/cm-1 2925, 2853, 1739, 1378, 1252; H (400 MHz; CDCl3) 0.10 (3H, s, SiC*H*3), 0.14 (3H, s, SiC*H*3), 0.93 (9H, s, SiCC*H*3), 0.90-1.25 (6H, m, CyH), 1.38-1.74 (5H, m, CyH), 1.83-1.92 (1H, m, CyC*H*), 1.98-2.07 (4H, m, C*H*2CHCyC*H*2), 3.99 (1H, s, C*H*2=COTBDMS), 4.03 (1H, s, C*H*2=COTBDMS), 4.95-5.02 (2H, m, C*H*2=CH), 5.70-5.81 (1H, m, CH2=C*H*); C (100 MHz; CDCl3) –4.8, –3.5, 18.0, 25.7, 26.9, 29.7, 34.8, 38.0, 39.2, 40.0, 90.9, 115.5, 138.4, 158.9; MS (EI) *m/z* (relative intensity) 308 (M+, 2), 267 (10), 225 (100), 197 (13), 115 (65), 75 (46), 55 (15); HRMS(CI) *MH+* found 309.2594, C19H37OSi requires 309.2614.

**1,1,2,2-tetramethyl-1-(1-methylene-3-phenylhept-6-enyloxy)-1-silapropane (5f)**

Using the procedure of Corey and Sodeoka7 4-phenyloct-7-en-2-one9 (500 mg) was reacted to give, after Kugelrohr distillation (bp 150 ˚C @ 0.01 mmHg), a colourless liquid (447 mg, 57%); max(neat)/cm-1 2930, 2858, 1738, 1640, 1453, 1253, 1003, 826; H (400 MHz; CDCl3) 0.11 (3H, s, SiC*H*3), 0.14 (3H, s, SiC*H*3), 0.94 (9H, s, SiCC*H*3), 1.57-1.67 (1H, m, PhCHC*H*2), 1.79-1.95 (3H, m, PhCHC*H*2C*H*2), 2.28-2.32 (2H, m, CHPhC*H*2COTBDMS), 2.86-2.93 (1H, m, C*H*Ph), 3.92 (1H, s, C*H*2=COTBDMS), 3.95 (1H, s, C*H*2=COTBDMS), 4.89-4.94 (2H, m, C*H*2=CH), 5.70-5.80 (1H, m, CH2=C*H*), 7.12-7.29 (5H, m, ArH); C (100 MHz; CDCl3) –4.7, 18.1, 25.8, 31.7, 34.8, 42.4, 44.5, 91.2, 114.5, 126.1, 127.8, 128.3, 138.8, 145.2, 157.5; MS (EI) *m/z* (relative intensity) 316 (M+, 2), 273 (5), 261 (31), 183 (10), 129 (9), 115 (48), 91 (100), 75 (65); HRMS *MH+* found 317.2294, C19H31OSi requires 317.2301.

**1,1,2,2-tetramethyl-1-(1-methylene-3-phenyloct-7-enyloxy)-1-silapropane (5g)**

Using the procedure of Corey and Sodeoka7 4-phenylnon-8-en-2-one9 (606 L, 2.47 mmol) was reacted to give, after Kugelrohr distillation (bp 150 ˚C @ 0.01 mmHg), a colourless liquid (398 mg, 49%); max(neat)/cm-1 2930, 1634, 1463, 1253, 1003H (400 MHz; CDCl3) 0.16 (3H, s, SiC*H*3), 0.20 (3H, s, SiC*H*3), 1.00 (9H, s, SiCC*H*3), 1.25-1.33 (2H, m, PhCHC*H*2CH2), 1.53-1.63 (1H, m, PhCHCH2C*H*2), 1.74-1.82 (1H, m, PhCHCH2C*H*2), 1.97-2.10 (2H, m, CH2=CHC*H*2), 2.33 (1H, dd *J* = 7.3 and 13.9, CHPhC*H*2COTBDMS), 2.37 (1H, dd *J* = 7.3 and 13.7, CHPhC*H*2COTBDMS), 2.88-2.96 (1H, m, C*H*Ph), 3.96 (1H, s, C*H*2=COTBDMS), 4.01 (1H, s, C*H*2=COTBDMS), 4.93-5.02 (2H, m, C*H*2=CH), 5.73-5.84 (1H, m, CH2=C*H*), 7.19-7.35 (5H, m, ArH); C (100 MHz; CDCl3) –4.7, 18.1, 25.8, 26.9, 33.8, 35.2, 42.9, 44.5, 91.1, 114.3, 126.0, 127.7, 128.2, 139.0, 145.5, 157.6; MS (EI) *m/z* (relative intensity) 330 (M+, 1), 261 (50), 197 (3), 158 (10), 147 (12), 117 (26), 91 (59), 84 (100), 75 (49), 71 (63), 57 (100).

The identity of the isomerised products **6a-g** was indicated by GCMS analysis of the RCM reaction mixtures and confirmed in one case by independent synthesis of **6b**:

**4-phenylhept-5-en-2-one**

4-phenylhept-5-en-2-one was synthesised from benzylidene acetone and 1-propenylmagnesium bromide using the procedure of Molander and coworkers9 and its spectroscopic data agreed with literature values.10

**1-(1-methylene-3-phenylhex-4-enyloxy)-1,1-diethyl-1-silapropane (6b)**

4-phenylhept-5-en-2-one was reacted according to the procedure for **5b** to yield a colourless liquid with the same NMR and GCMS data as the byproduct of the RCM reactions: H (400 MHz; CDCl3) 0.66 (6H, q, *J* = 8.0, SiCH2), 0.96 (9H, t, *J* = 8.0, SiCH2C*H*3), 1.64-1.66 (2H, m, C*H*2CH=CH), 2.28-2.46 (m, 2H, CHPhC*H*2), 3.55-3.75 (1H, m, CHPh), 3.94 (1H, s, C(OSiEt3)=C*H*2), 3.99 (1H, s, C(OSiEt3)=C*H*2), 5.37-5.69 (2H, m, C*H*=C*H*), 7.14-7.32 (5H, m, ArH); C (100 MHz; CDCl3) 5.0, 6.8, 18.1, 43.4, 45.9, 90.6, 125.0, 126.0, 127.8, 128.3, 134.6, 144.9, 157.3; MS (EI) *m/z* (relative intensity) 302 (M+, 3), 287 (6), 247 (4), 211 (6), 131 (100), 115 (10), 91 (26).

**Representative procedure for ring closing metathesis of 5a-g to yield 7a-g**

**2** (26 mg, 30.2 mol) was dissolved in anhydrous benzene (20 mL) under an atmosphere of N2 and freshly activated 4Å molecular sieves (1g) were added. The resulting suspension was heated to reflux and a solution of **5g** (50 mg, 151 mol) in anhydrous benzene (10 mL) was added over 30 minutes. Once addition was complete reflux was continued for a further 30 minutes, the reaction was allowed cool to room temperature and the solvent was removed *in vacuo* . The residue was analysed by 1H NMR spectroscopy and GCMS.

**Characteristic NMR signals for cyclised products 8b-g**

|  | **Compound**  **R1  R2** | | **7**  **1H NMR shift in ppm** | **7**  **1H NMR shift in ppm** |
| --- | --- | --- | --- | --- |
| **7b** | Ph | TMS | 4.68 | 3.43-3.51 |
| **7c** | Ph | TBDMS | 4.68 | 3.43-3.51 |
| **7d** | Ph | TIPS | 4.70 | 3.44-3.52 |
| **7e** | Cy | TBDMS | 4.63 | - |
| **7f** | Ph | TBDMS | 4.94 | 2.83-2.92 |
| **7g** | Ph | TBDMS | 5.15 | 2.81-2.90 |

**Mass Spectra of 7b-g**

**7b**: MS (EI) *m/z* (relative intensity) 274 (M+, 25), 245 (28), 143 (32), 115 (27), 103 (100), 87 (31), 59 (42).

**7c**: MS (EI) *m/z* (relative intensity) 274 (M+, 7), 217 (21), 189 (11), 143 (22), 91 (22), 75 (100).

**7d:** MS (EI) *m/z* (relative intensity) 316 (M+, 5), 273 (100), 245 (11), 131 (64), 75 (62), 59 (57).

**7e:** MS (EI) *m/z* (relative intensity) 280 (M+, 1), 223 (3), 197 (100), 73 (76).

**7f:** MS (EI) *m/z* (relative intensity) 288 (M+, 11), 231 (54), 157 (14), 91 (15), 75 (100).

**7g:** MS (EI) *m/z* (relative intensity) 302 (M+, 12), 245 (18), 171 (43), 91 (22), 75 (100).

**4,4-dimethyloct-7-en-2-one**

Mesityl oxide (3.00 g, 30.6 mmol), magnesium (988 mg, 40.7 mmol), TMEDA (4.61 mL, 30.6 mmol), TMSCl (3.88 ml, 30.6 mmol) and 4-bromo-1-butene (4.13 mL, 40.7 mmol) were reacted according to the procedure of Molander and co-workers9 to give an orange oil (3.21 g, 68%); max(neat)/cm-1 257, 1713, 1641, 1358, 1151, 907; H (400 MHz; CDCl3) 1.00 (6H, s, C(C*H*3)2), 1.37-1.44 (2H, m, CH2C*H*2C(CH3)2), 1.98-2.05 (2H, m, C*H*2CH2C(CH3)2), 2.13 (3H, s, COC*H*3), 2.38 (2H, s, C*H*2CO) 4.91-5.03 (2H, m, C*H*2=CH), 5.77-5.86 (1H, m, CH2=C*H*); C (100 MHz; CDCl3) 27.2, 28.7, 32.5, 33.5, 41.5, 53.9, 114.1, 139.2, 208.7; MS (EI) *m/z* (relative intensity) 154 (M+, 1), 139 (10), 96 (72), 81 (100), 55 (64).

**1-(3,3-dimethyl-1-methylenehept-6-enyloxy)-1,1-dimethyl-1-silaethane (8)**

4,4-dimethyloct-7-en-2-one (250 mg, 1.62 mmol) was reacted according to the procedure for **5a** to give a colourless oil (226 mg, 62%); max(neat)/cm-1 2958, 1738, 1367, 1252, 1014, 841; H (400 MHz; CDCl3) 0.21 (9H, m, Si(C*H*3)3), 0.91 (6H, m, C(C*H*3)2), 1.32-1.36 (2H, m, CH2C*H*2C(CH3)2), 1.92 (2H, m, C(CH3)3C*H*2C(OTMS)), 2.00-2.06 (2H, m, C*H*2CH2C(CH3)2), 3.97 (1H, s, C*H*2=COTMS), 4.06 (1H, s, C*H*2=COTMS), 4.88-5.03 (2H, m, C*H*2=CH), 5.77-5.86 (1H, m, CH2=C*H*); C (100 MHz; CDCl3) 0.13, 27.6, 28.7, 33.1, 41.5, 48.3, 92.1, 113.6, 139.9, 158.1; MS (EI) *m/z* (relative intensity) 226 (M+, 3), 211 (49), 171 (72), 115 (96), 73 (100), 55 (89); HRMS *MH+* found 227.1836, C13H27OSi requires 227.1831.

**1-(5,5-dimethylcyclohex-1-enyloxy)-1,1-dimethyl-1-silaethane (9)**

**11** (40 mg, 177 L) was reacted according to the procedure for **3a** to give **9** in 89% yield; selected signals: H (400 MHz; CDCl3) 0.20 (9H, m, Si(C*H*3)3), 0.94 (6H, m, C(C*H*3)3), 4.84-4.86 (m, C*H*=COTMS); MS (EI) *m/z* (relative intensity) 198 (M+, 31), 183 (84), 170 (31), 127 (53), 115 (23), 73 (100).

**References:**

1 The solvent column is composed of activated alumina (A-2). For toluene a supported copper redox catalyst (Q-5) reactant is also employed. See A. B. Pangborn, M. A. Giardello, R. H. Grubbs, R. K. Rosen and F. J. Timmers Organometallics, 1996, 15, 1518

2 D. Cai, I. F. Cottrell, D. L. Hughes, and J. F. Payack International Patent WO 97/09336, 1997**.**

3 A. R. Maguire, N. R. Buckley, P. O'Leary, and G. Ferguson, *J. Chem. Soc., Perkin Trans. 1*, 1998, 4077.

4 P. Jones, C. Kishan Reddy, and P. Knochel, *Tetrahedron*, 1998, **54**, 1471.

5 G. Majetich, A. M. Casares, D. Chapman, and M. Behnke, *Tetrahedron Lett.*, 1983, **24**, 1909.

6 C. H. Heathcock, S. Kiyooka, and T. A. Blumenkopf, *J. Org. Chem.*, 1984, **49**, 4214.

7 E. J. Corey and M. Sodeoka, *Tetrahedron Lett.*, 1991, **32**, 7005.

8 R. J. Liedtke, A. F. Gerrard, J. Diekman, and C. Djerassi, *J. Org. Chem.*, 1972, **37**, 776.

9 G. A. Molander and J. A. McKie, *J. Org. Chem.*, 1995, **60**, 872.

10 N. Boccara and P. Maitte, *Bull. Soc. Chim. Fr.*, 1972, 1448.
